# Supplementary material for: A green and efficient strategy for leaching critical metals from spent LiNi x Co y Mn z O 2 cathodes: modulating the dielectric SiO 2 contact-electro-catalytic activity
Source: Royal Society of Chemistry journal article supplement (doi:10.1039/d5gc04080a), 2025-11-13
Supplement: d5gc04080a1.pdf [file d5gc04080a1.pdf]

A green and efficient strategy for leaching critical metals from spent  $\text{LiNi}_x\text{Co}_y\text{Mn}_z\text{O}_2$  cathodes: Modulating the dielectric  $\text{SiO}_2$  contact-electro-catalytic activity

Man Yang<sup>a</sup>, Shuhao Qin<sup>a, b, \*</sup>, Youchang Yang<sup>b</sup>, Mingmi Wu<sup>a</sup>, Ting Lei<sup>b</sup>,

Yufei Liu<sup>a</sup>, Huiju Shao<sup>a, b, \*</sup>

<sup>a</sup> College of Materials Science and Metallurgy, Guizhou University, Guiyang 550025, China

<sup>b</sup> National Engineering Research Center for Compounding and Modification of Polymer Materials, Guiyang 550014, China

\*Corresponding author, e-mail address: [pec.shqin@gzu.edu.cn](mailto:pec.shqin@gzu.edu.cn) (S.H. Qin); [shj820423@163.com](mailto:shj820423@163.com) (H.J. Shao)

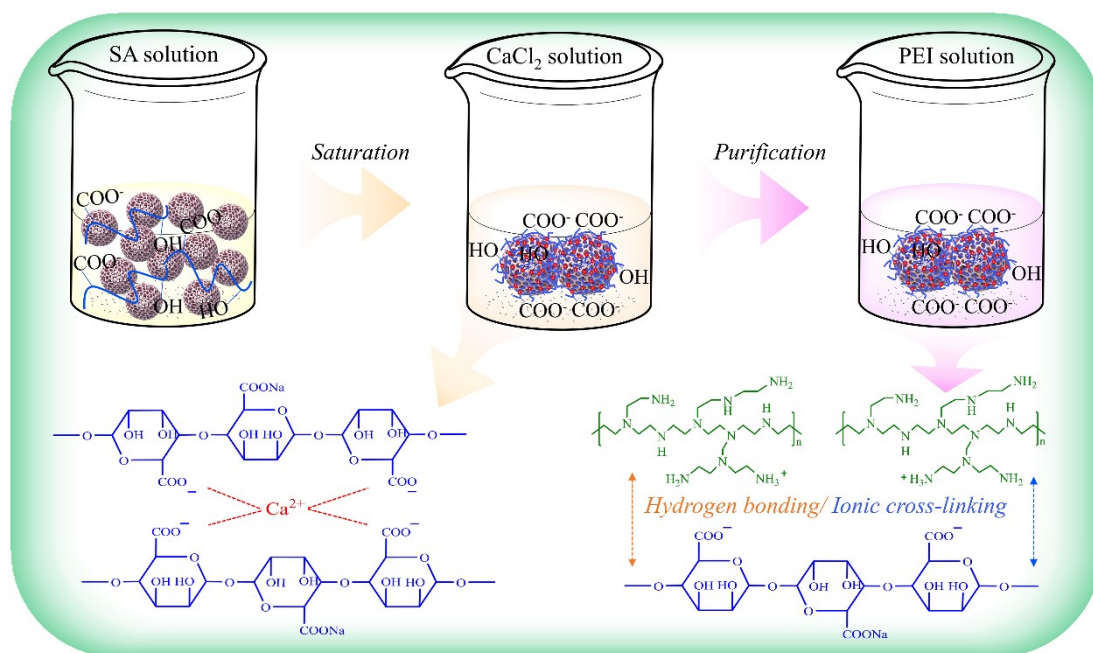

Fig.S1 Schematic diagram of the fabrication of SA@SiO<sub>2</sub> and PEI-SA@SiO<sub>2</sub> microspheres.

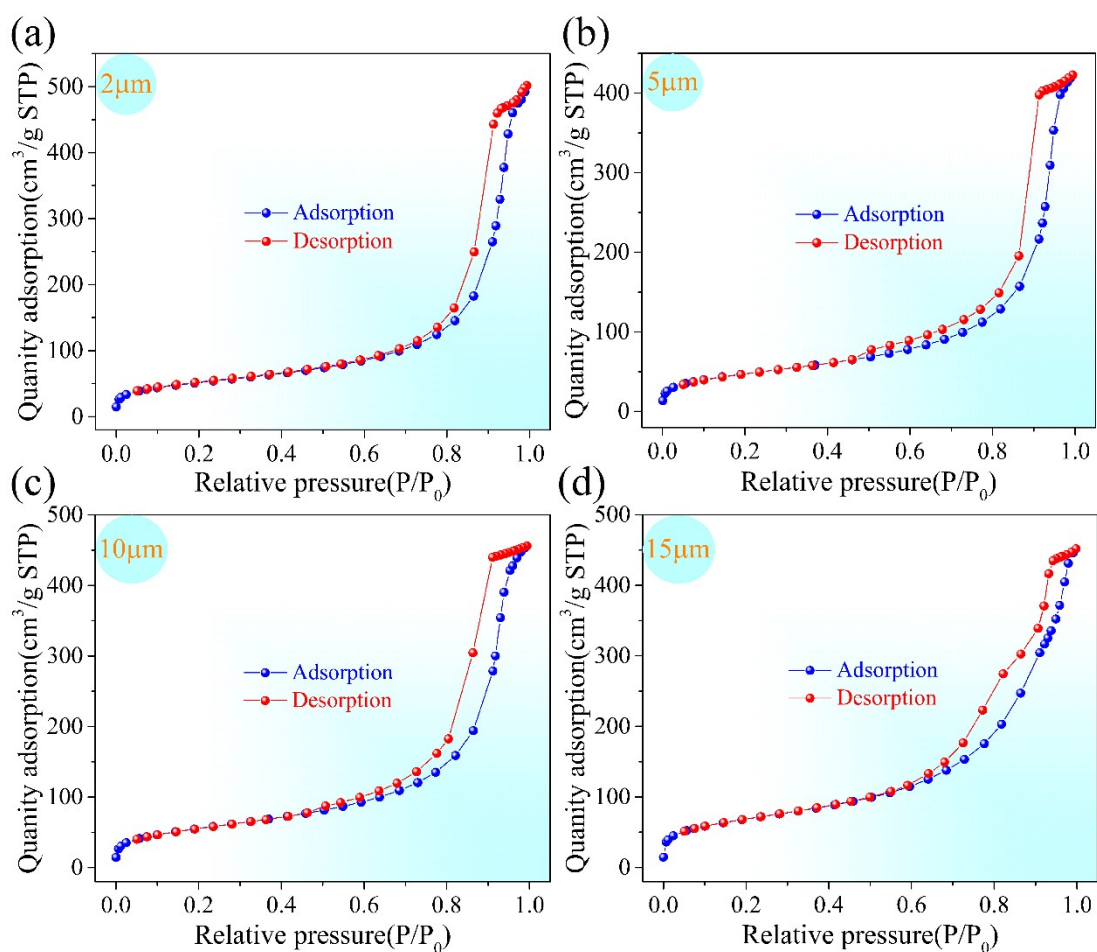

Fig.S2 BET adsorption and desorption isotherms of 2 μm (a), 5 μm (b), 10 μm (c) and 15 μm (d) porous SiO<sub>2</sub> microspheres.

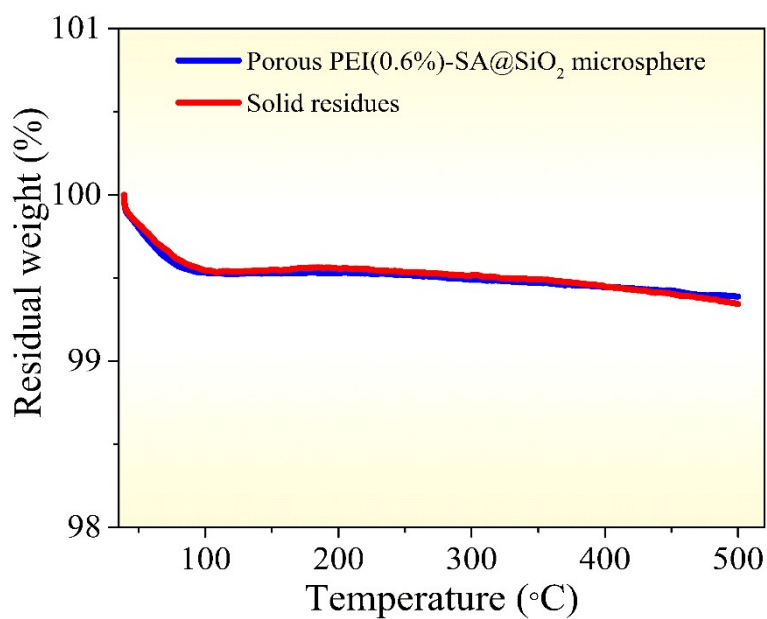

Fig.S3 TGA curves of PEI(0.6%)-SA@ SiO<sub>2</sub> microspheres and purified solid residues.

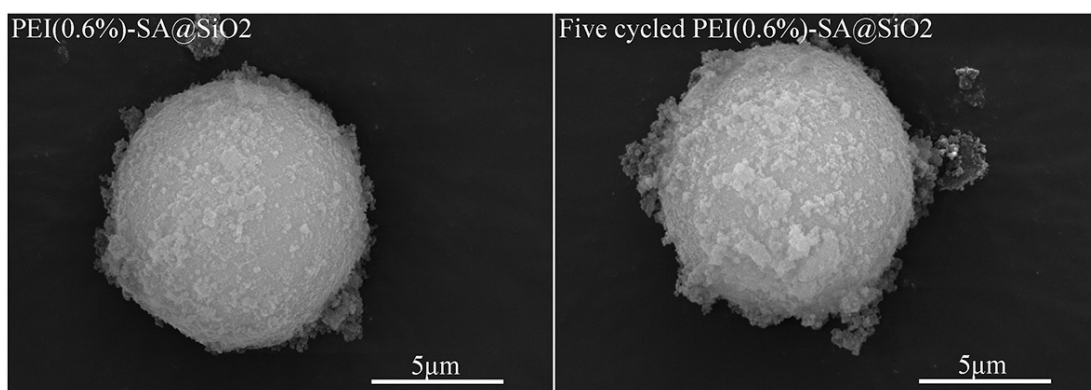

Fig.S4 SEM images of PEI(0.6%)-SA@SiO<sub>2</sub> microspheres before and after five leaching cycles.

### Economic analysis:

An economic assessment was performed on the proposed process, with 1 kg of spent LiNi<sub>x</sub>Co<sub>y</sub>Mn<sub>z</sub>O<sub>2</sub> powder as the basis for calculation. While the technology is considered highly scalable, we have taken a conservative approach in estimating consumption to ensure robustness for potential large-scale deployment.

Assumed Conditions: 1 \$=7.12 RMB, 1 kWh=0.2 \$, 1 t industrial water = 0.91 \$.

#### 1. Material cost

The total cost for 0.12 g of PEI (0.6%)-SA@SiO<sub>2</sub> microspheres was calculated to be 8.453 \$. This cost comprises SiO<sub>2</sub> microspheres (\$8.43, 70.22 \$/g), SA (\$0.0087, 0.058 \$/g), PEI (\$0.0102, 0.17 \$/g), and CaCl<sub>2</sub> (\$0.0039, 0.007 \$/g);

50 L 0.2 mol/L C<sub>6</sub>H<sub>8</sub>O<sub>7</sub>·H<sub>2</sub>O (0.00466 \$/g): 9.79 \$;

50 L H<sub>2</sub>O: 0.0455 \$;

#### 2. Energy consumption

Ultrasonic machine + heating: 200W\*0.5h+600\*8h=4.9 kWh=0.98 \$.

#### 3. Total costs

Total energy cost + Total material cost=8.453 \$ + 9.79 \$ + 0.0455 \$ + 0.98 \$= 19.27.
